# Supplementary material
Source: MDPI journal article supplement (https://www.mdpi.com/2297-8739/9/12/449)
Supplement: s1 [file s1]

## Supplementary Information

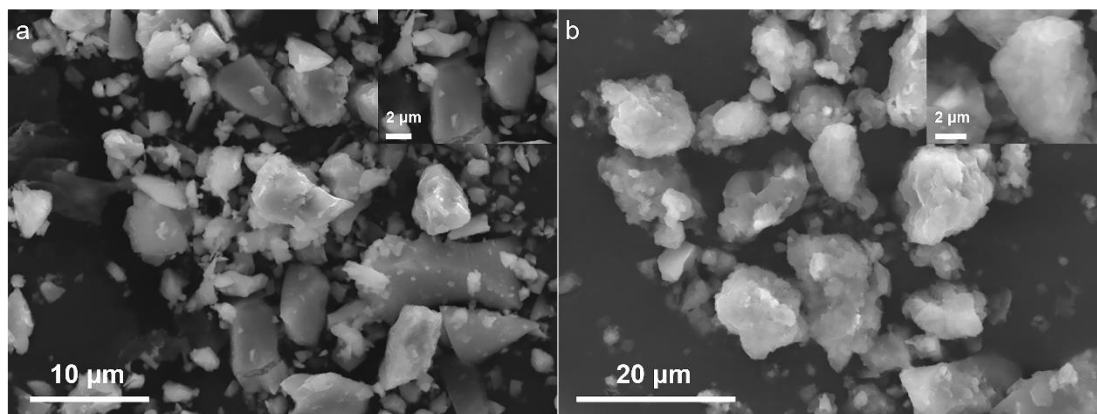

**Figure S1.** SEM images of (a) waste catalyst powder and (b) roasting product.

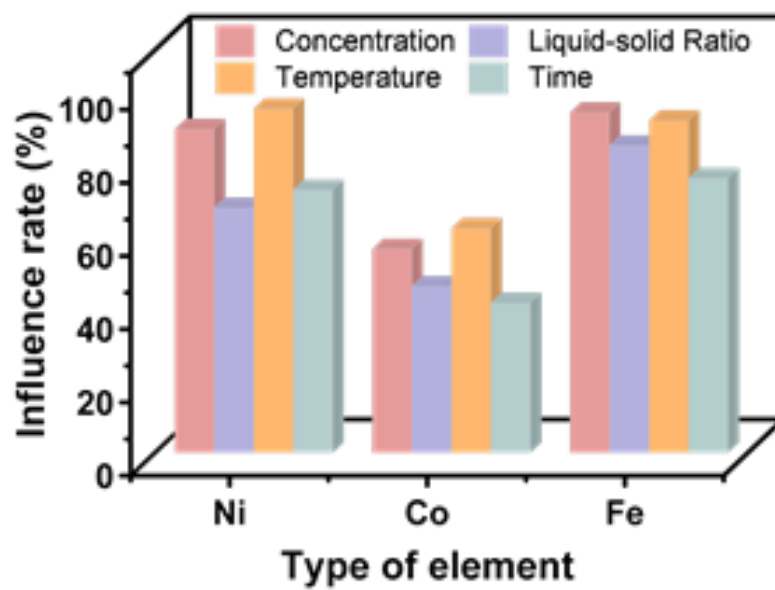

**Figure S2.** The influence rate of roasting conditions on leaching efficiency of metal element.

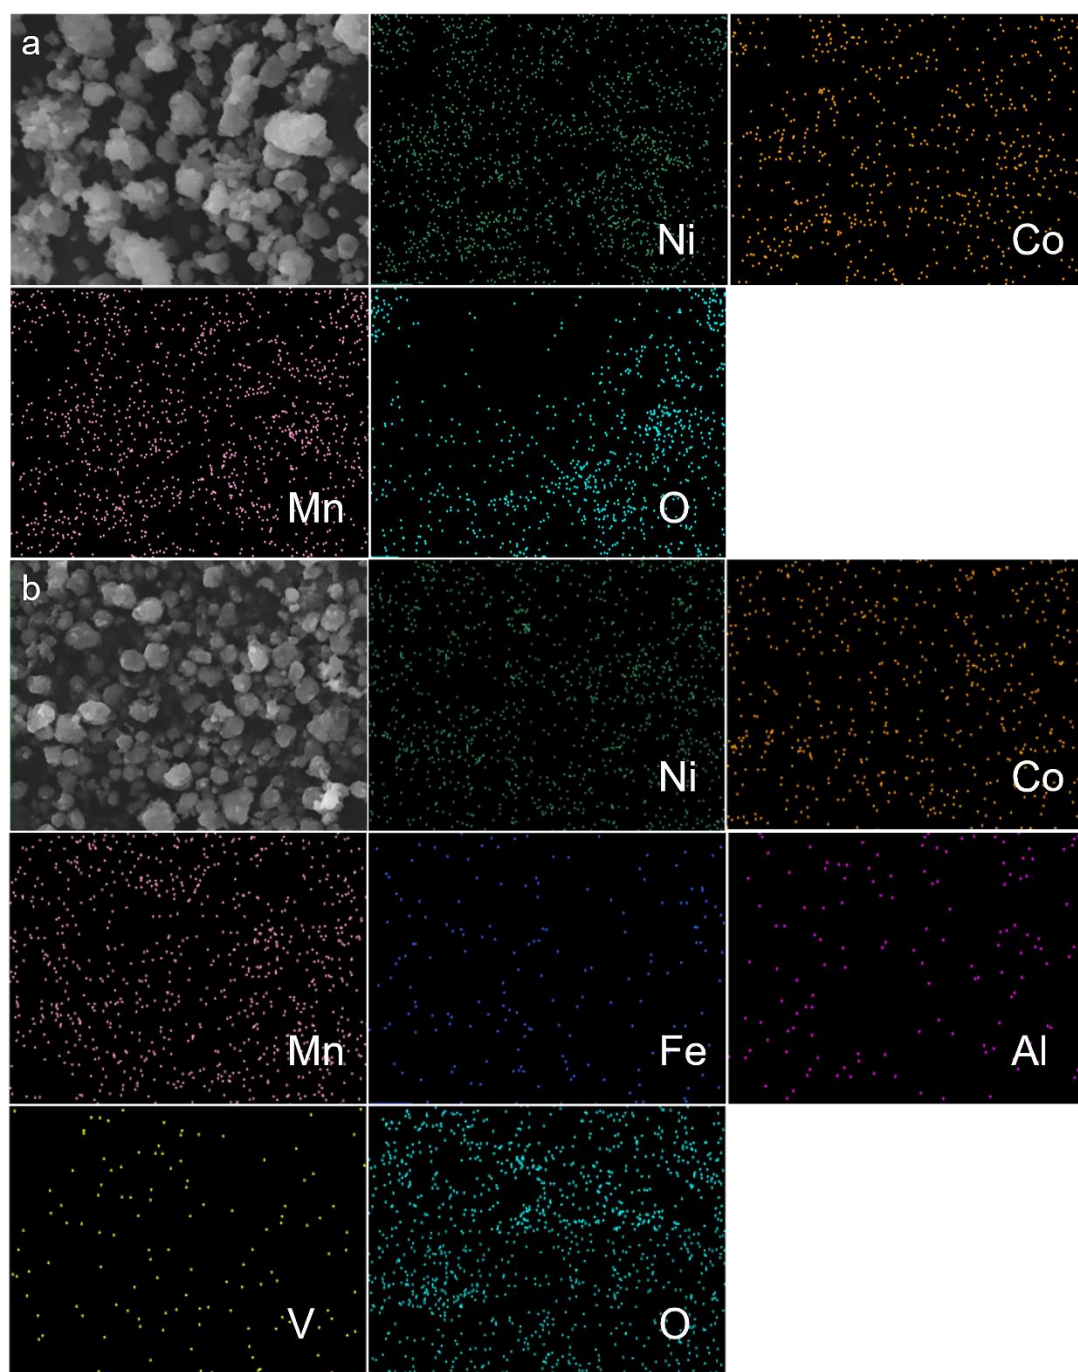

**Figure S3.** EDS mapping of (a) S—NCM and (b) C—NCM.

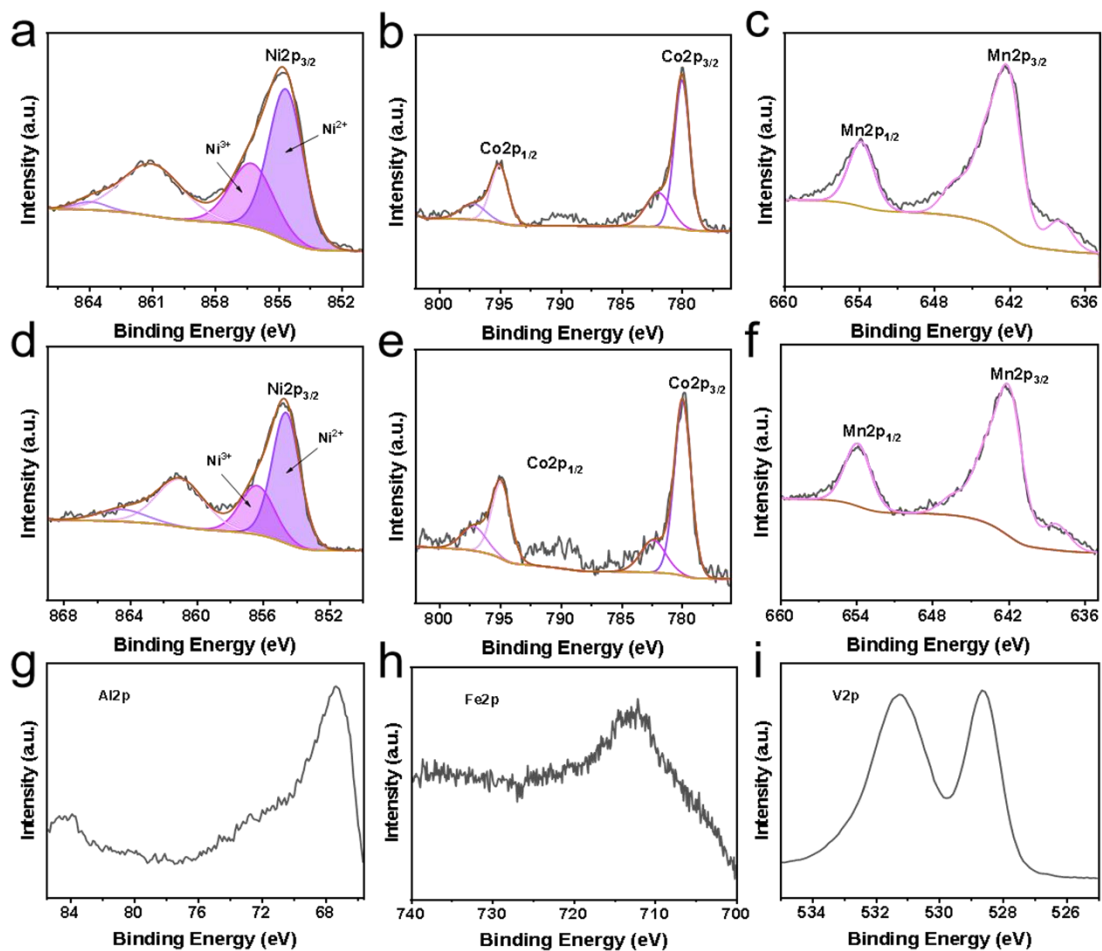

**Figure S4.** XPS spectra of Ni 2p for S-NCM (a), C-NCM (d), Co 2p for S-NCM (b), C-NCM (e), Mn 2p for S-NCM (c), C-NCM (f). And Al 2p (g), Fe 2p (h), V 2p (i) for C-NCM.

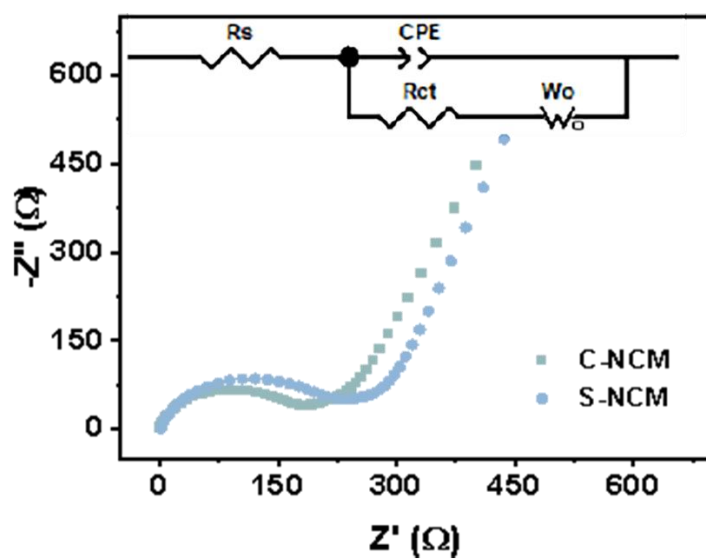

**Figure S5.** Comparison of C-NCM and S-NCM of Nyquist plots.



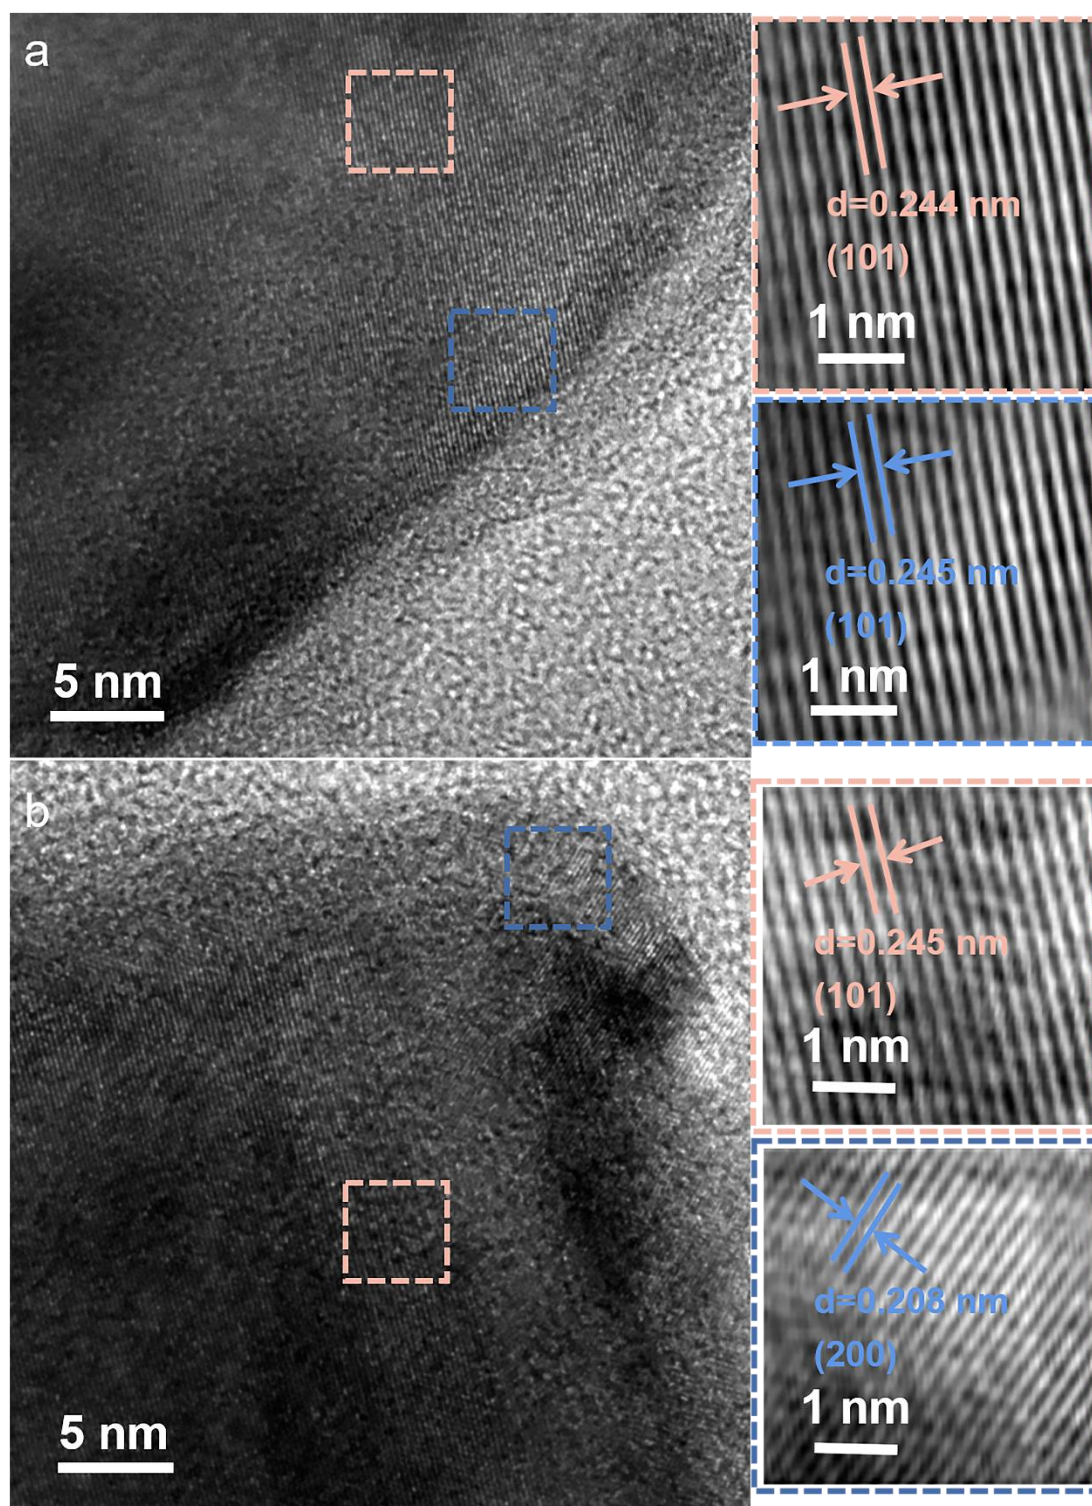

**Figure S6.** TEM images of (a) C-NCM and (b) S-NCM after 300 cycles at 1 C.

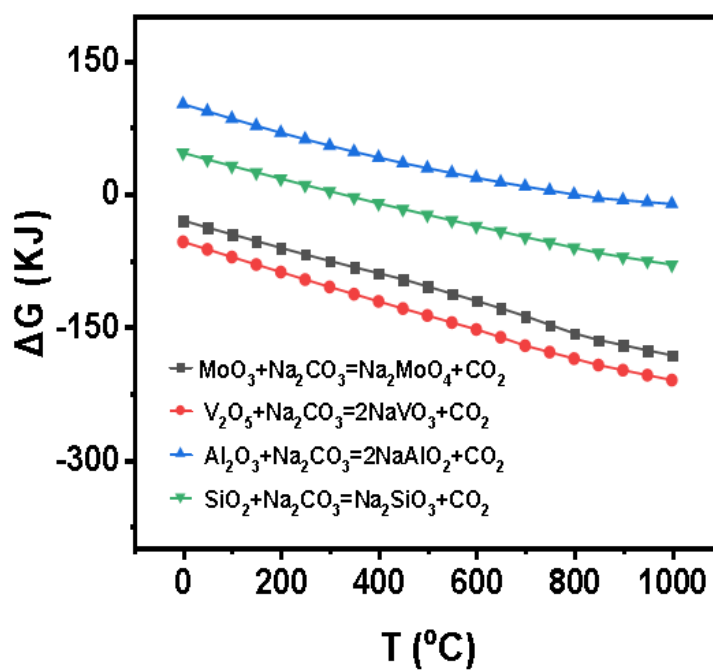

**Figure S7.** Relationship between  $\Delta G$  and temperature for reaction equations as calculated by HSC 6.0 software.

**Table S1.** Leaching efficiency of metal elements in waste HDS catalyst during roasting process control stage.

| Roasting condition                 |     | Leaching efficiency (%) |     |     |
|------------------------------------|-----|-------------------------|-----|-----|
|                                    |     | Co                      | Ni  | Fe  |
| Temperature ( $^{\circ}\text{C}$ ) | 500 | 0.6                     | 0.1 | 0.0 |
|                                    | 550 | 0.0                     | 0.0 | 0.0 |
|                                    | 600 | 0.2                     | 0.0 | 0.5 |
|                                    | 650 | 0.0                     | 0.0 | 1.5 |
|                                    | 700 | 0.0                     | 0.1 | 0.1 |
| Time (h)                           | 1.0 | 0.1                     | 0.0 | 0.0 |
|                                    | 1.5 | 0.0                     | 0.0 | 0.0 |
|                                    | 2.0 | 0.0                     | 0.0 | 0.0 |
|                                    | 2.5 | 0.0                     | 0.0 | 1.5 |
|                                    | 3.0 | 0.0                     | 0.0 | 0.0 |

|             |     |     |     |     |
|-------------|-----|-----|-----|-----|
|             | 80  | 0.0 | 0.0 | 0.0 |
|             | 90  | 0.0 | 0.0 | 0.0 |
| Na/WC (wt%) | 100 | 0.0 | 0.0 | 0.0 |
|             | 110 | 0.0 | 0.0 | 1.5 |
|             | 120 | 0.0 | 0.0 | 1.5 |

**Table S2.** Leaching efficiency of metal elements under optimal acidolysis condition.

| Element                 | Co    | Ni   | Fe   |
|-------------------------|-------|------|------|
| Leaching efficiency (%) | 100.0 | 93.9 | 92.2 |

**Table S3.** Solubility product and precipitated pH of main metal elements in acid leaching solution.

| Equilibrium Reaction         | $K_{sp}$               | pH            |               |
|------------------------------|------------------------|---------------|---------------|
|                              |                        | Precipitation | Disappearance |
| $Ni^{2+} + 2OH^- = Ni(OH)_2$ | $5.48 \times 10^{-16}$ | 6.37          | 8.87          |
| $Co^{2+} + 2OH^- = Co(OH)_2$ | $5.92 \times 10^{-15}$ | 6.89          | 9.39          |
| $Mn^{2+} + 2OH^- = Mn(OH)_2$ | $1.90 \times 10^{-13}$ | 7.64          | 10.14         |
| $Fe^{3+} + 2OH^- = Fe(OH)_3$ | $2.79 \times 10^{-39}$ | 1.15          | 2.82          |

**Table S4.** Rietveld refinement results of S—NCM and C—NCM.

| Specimen | a (Å)   | c (Å)    | c/a     | $R_{wp}$ (%) | $I_{(003)}/I_{(104)}$ |
|----------|---------|----------|---------|--------------|-----------------------|
| S-NCM    | 2.86921 | 14.23438 | 4.96108 | 2.61         | 1.49                  |
| C-NCM    | 2.86854 | 14.23259 | 4.96161 | 2.18         | 1.09                  |

**Table S5.** The calculation results of  $R_s$ ,  $R_{ct}$  and  $R_{total}$  for the electrodes before testing.

| Sample | $R_s$ ( $\Omega$ ) | $R_{ct}$ ( $\Omega$ ) | $R_{total}$ ( $\Omega$ ) |
|--------|--------------------|-----------------------|--------------------------|
| C—NCM  | 0.817              | 156.600               | 157.417                  |
| S—NCM  | 1.089              | 203.100               | 204.189                  |

**Table S6.** Impurity element content in water immersion experiment (WIE) and acidolysis experiment (AE).

| Element                           | Ni     | Co     | Mo     | V     | Fe    | Al   | Mn  |
|-----------------------------------|--------|--------|--------|-------|-------|------|-----|
| Impurity content<br>of WIE (mg/L) | 0      | 1.5    | 2362.4 | 546.8 | 0     | 13.0 | 0   |
| Impurity content<br>of AE (mg/L)  | 2506.0 | 1036.0 | 8.0    | 78.5  | 894.5 | 16.0 | 1.0 |
